# Supplementary material for: The effect of oxygen on the microwave-assisted synthesis of carbon quantum dots from polyethylene glycol
Source: Royal Society of Chemistry journal article supplement (doi:10.1039/c7ra01804e), 2017-01-01
Supplement: c7ra01804e1.pdf [file c7ra01804e1.pdf]

## Electronic Supplementary Information (ESI)

# Significance of oxygen on microwave-assisted synthesis of carbon quantum dots from polyethylene glycol

Yunyang Zhao,<sup>a</sup> Songlin Zuo<sup>a,\*</sup> and Meng Miao<sup>a</sup>

<sup>a</sup> Jiangsu Key Laboratory of Biomass-Based Green Fuels

College of Chemical Engineering, Chemicals, Nanjing Forestry University, Nanjing  
210037, China.

\* Corresponding author. E-mail addresses: zslnl@hotmail.com, zslnl@njfu.com.cn (S. Zuo).

Tel.: +86 25 85428840; fax: +86 25 85418873.

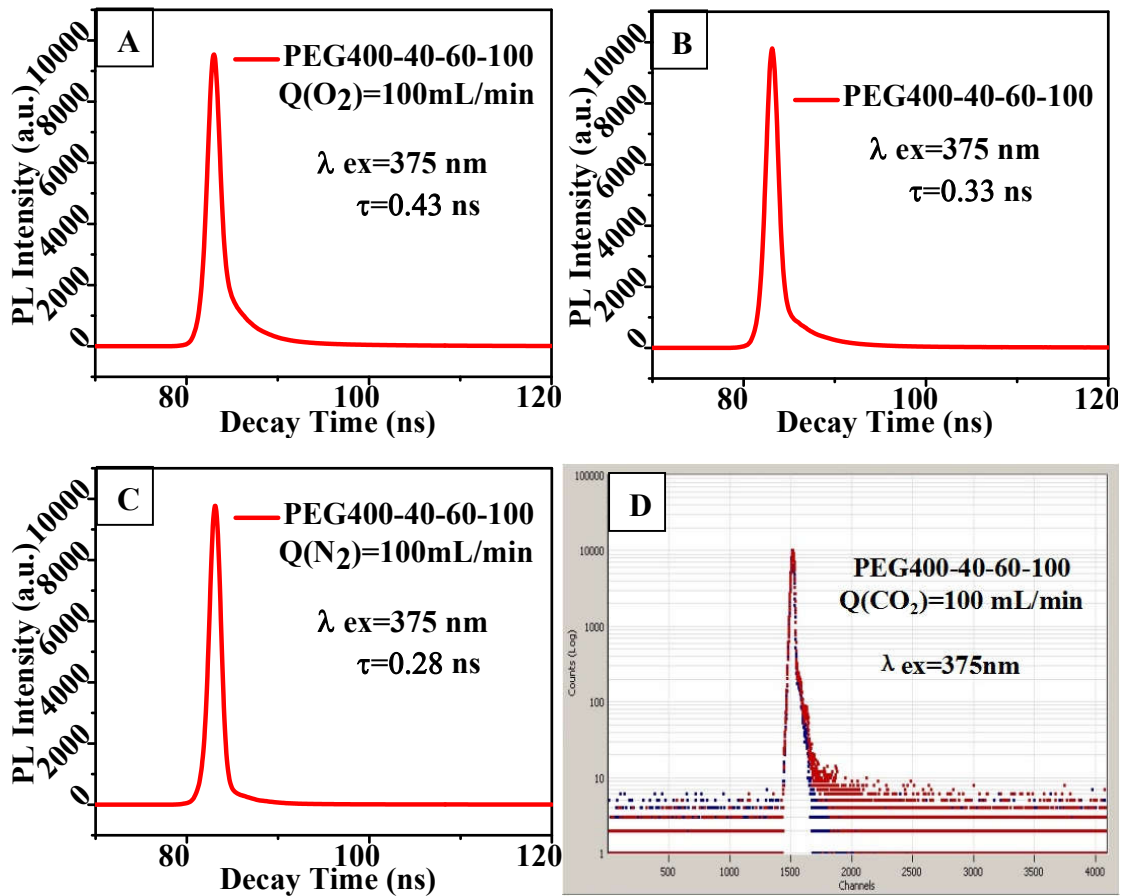

**Fig. S1** The fluorescence decay curve of CQDs synthesized under different gas atmospheres.

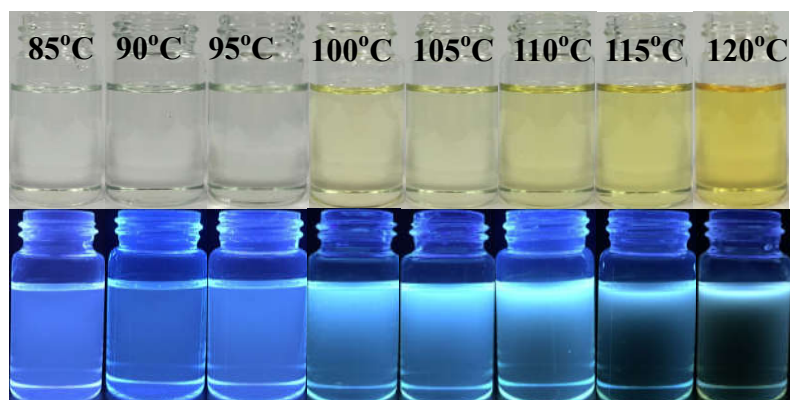

**Fig. S2 Optical images of CQDs with different reaction temperatures under daylight (above) and 365 nm UV light (below).**

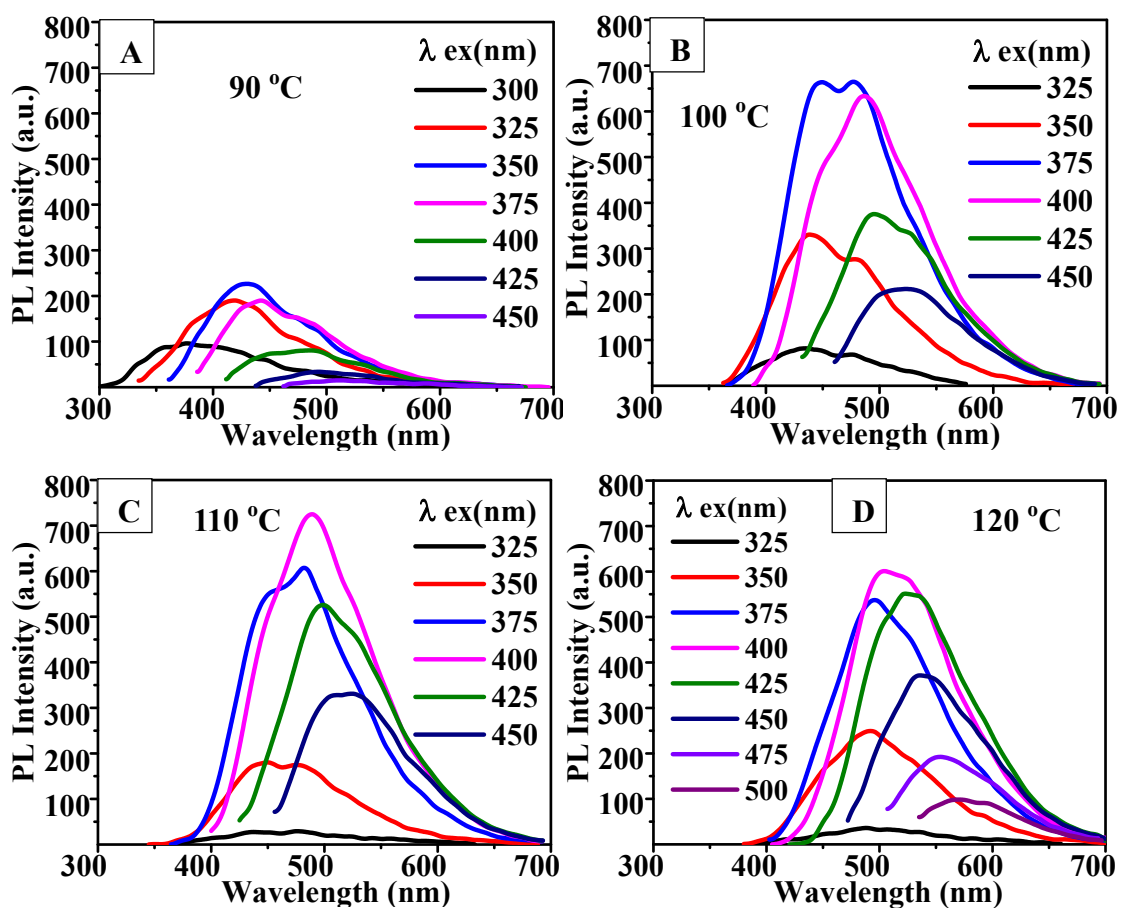

Fig. S3 Fluorescence emission spectra of CQDs prepared for different reaction temperatures.

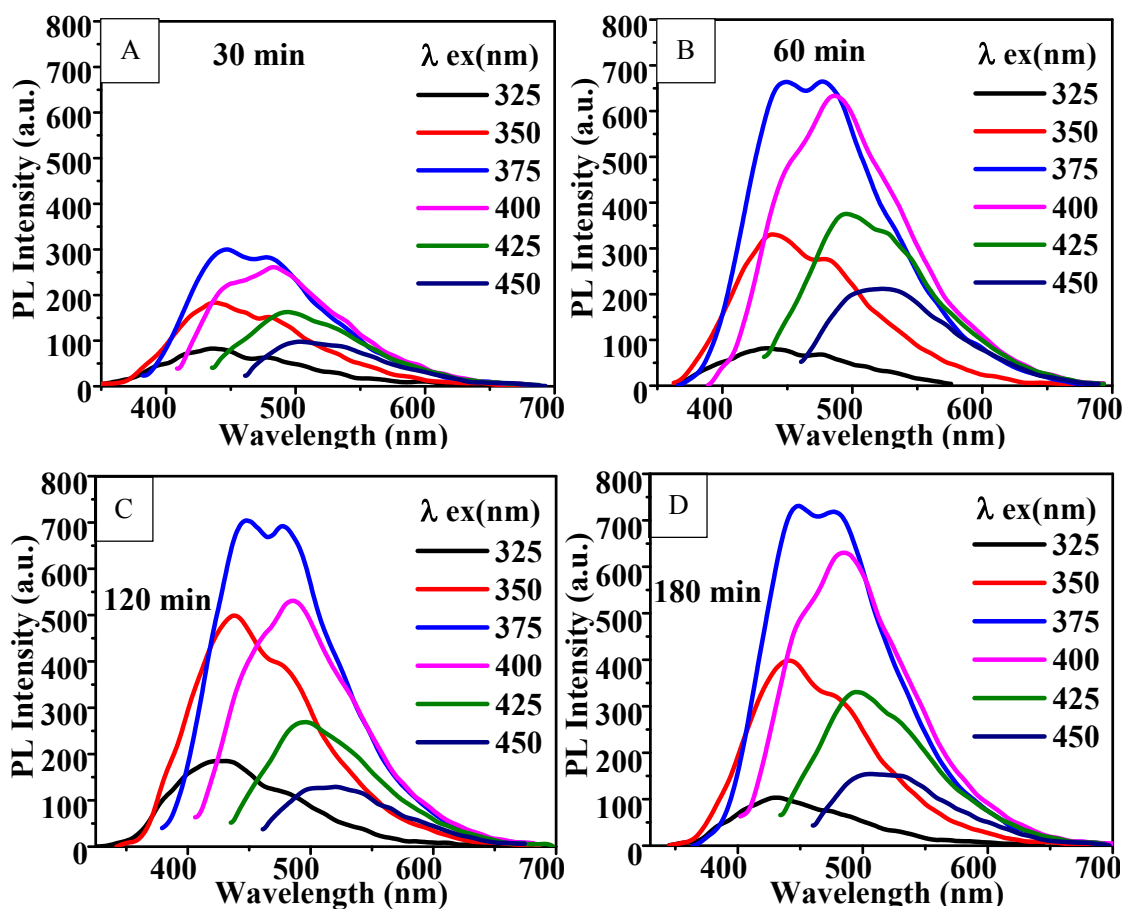

Fig. S4 Fluorescence emission spectra of CQDs prepared for different reaction times.

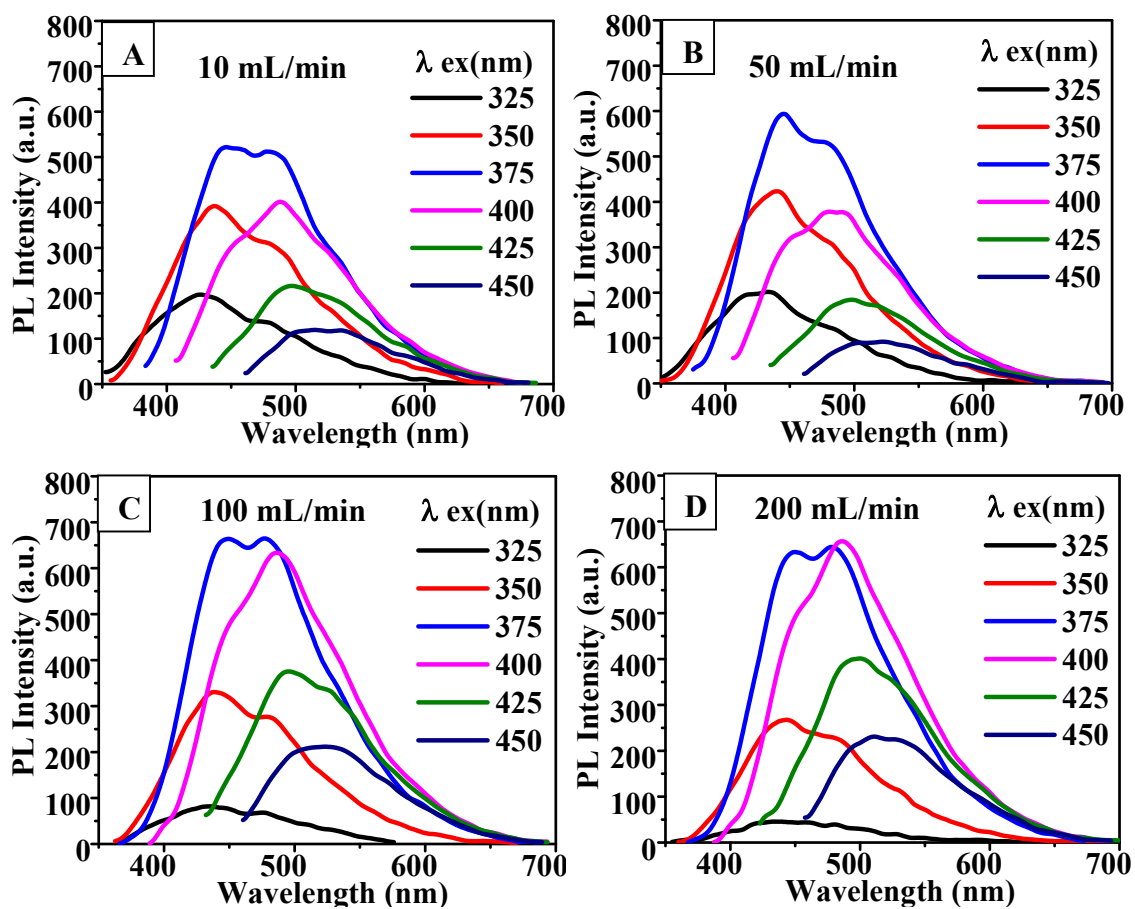

Fig. S5 Fluorescence emission spectra of CQDs prepared under different oxygen flow rate at 100 °C for 60 min.
